# Supplementary material
Source: ML conference proceedings conference paper supplement (https://openreview.net/forum?id=zQu9QNL0in)

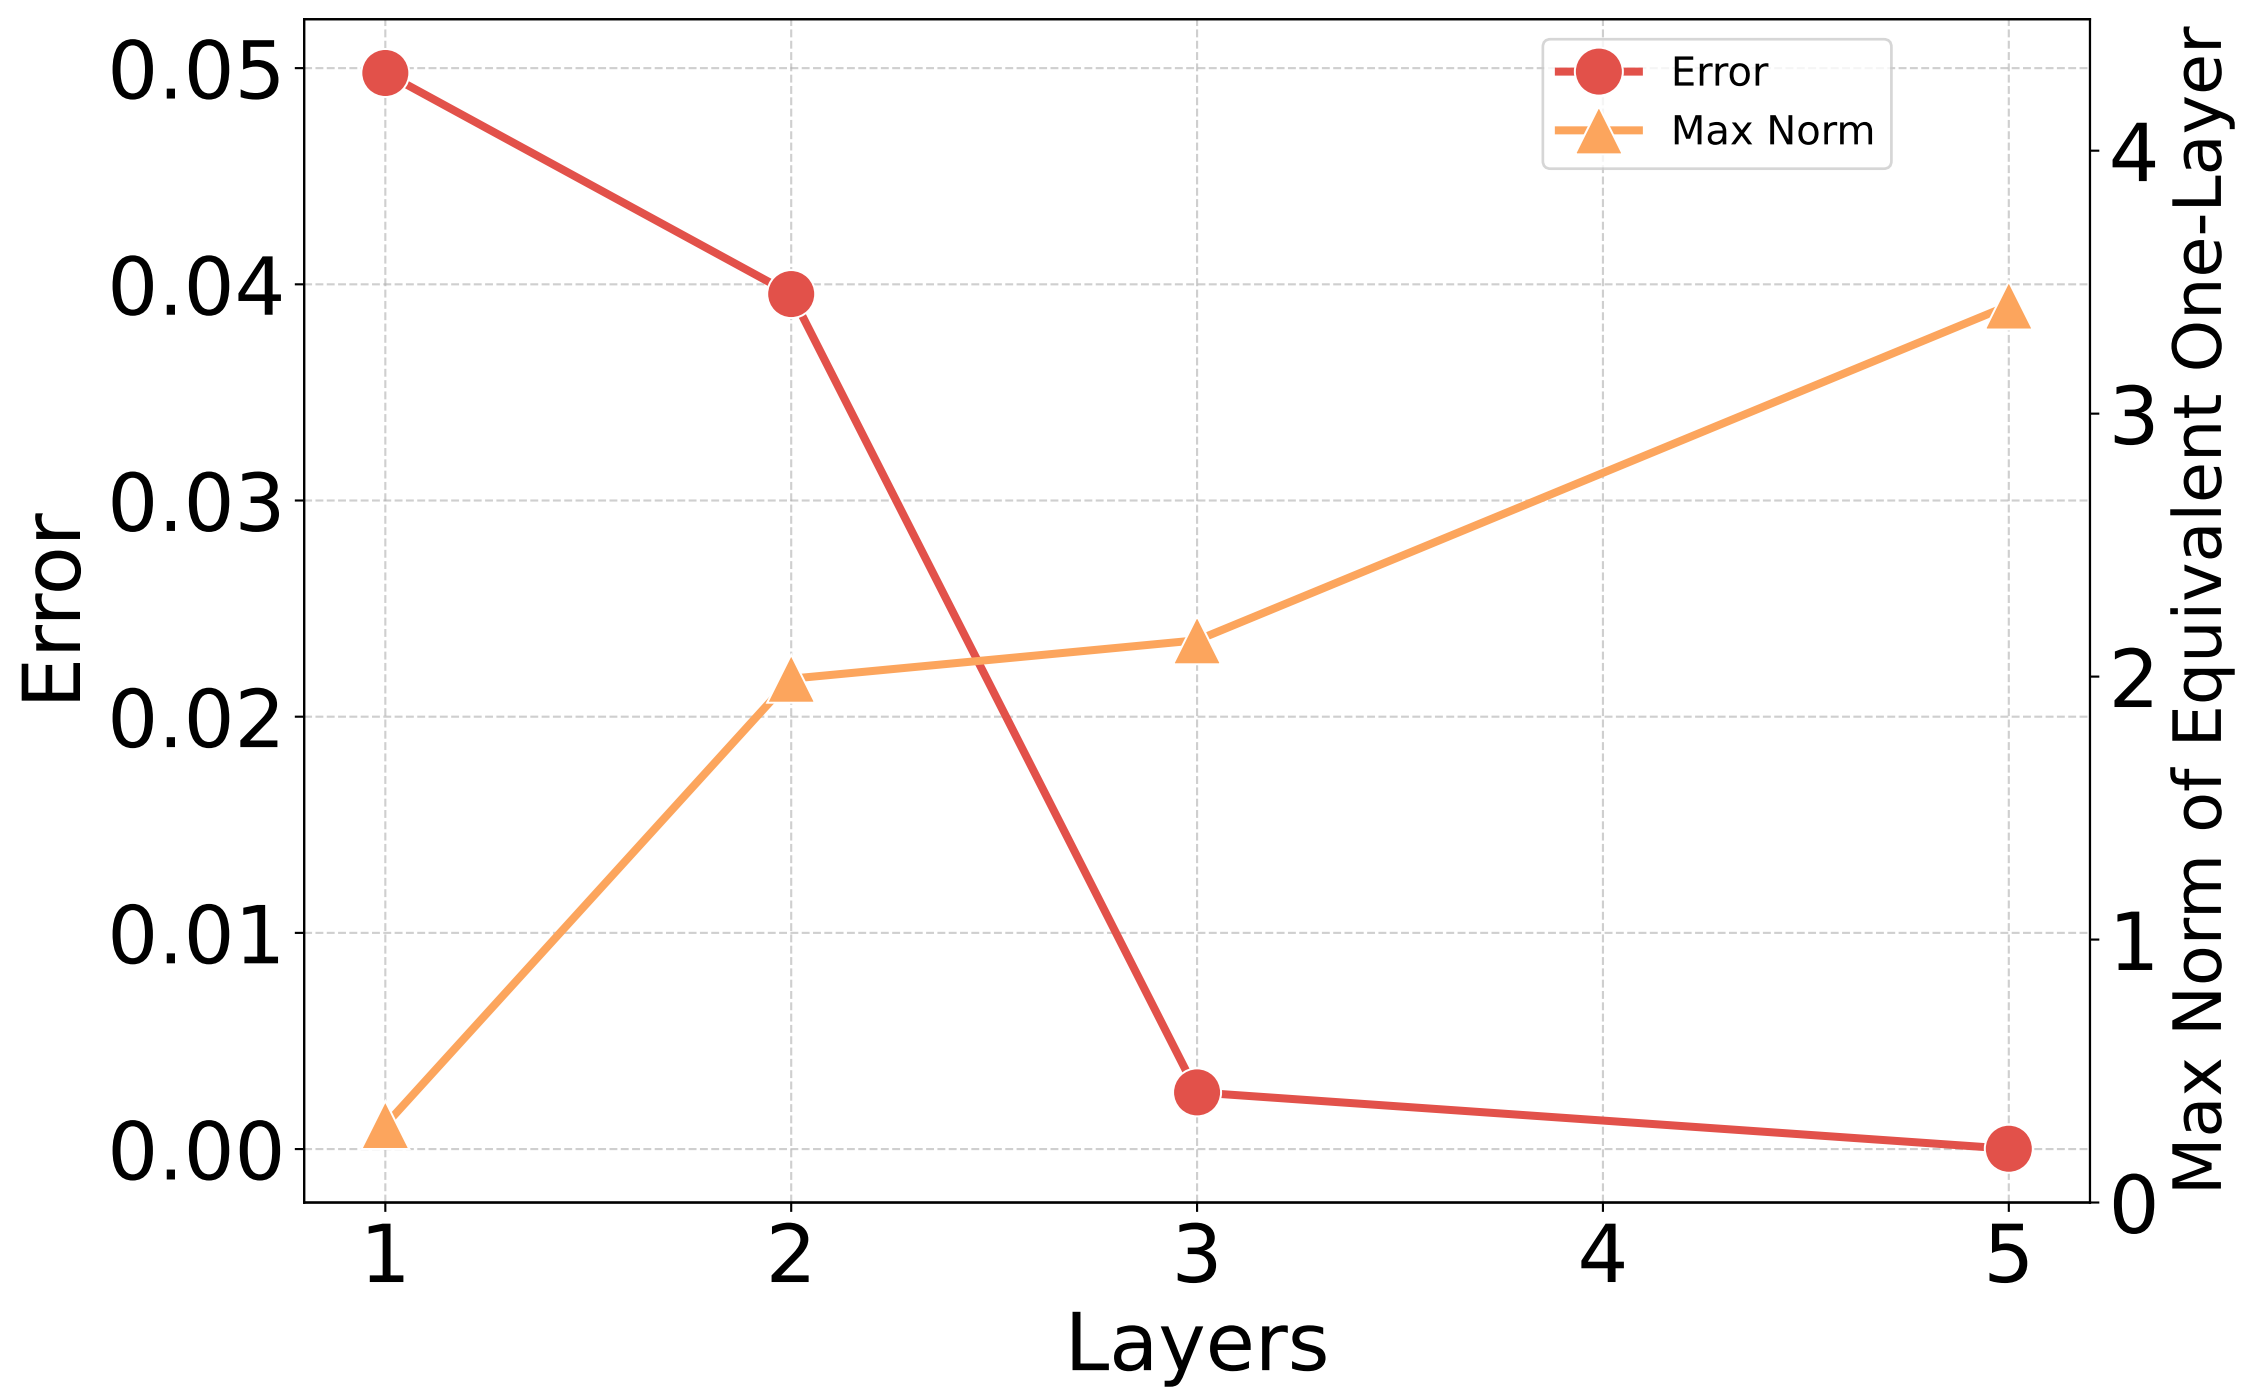

Supplement: supplementary_material [file impulse_plot.pdf › figs/impulse_plot.pdf]

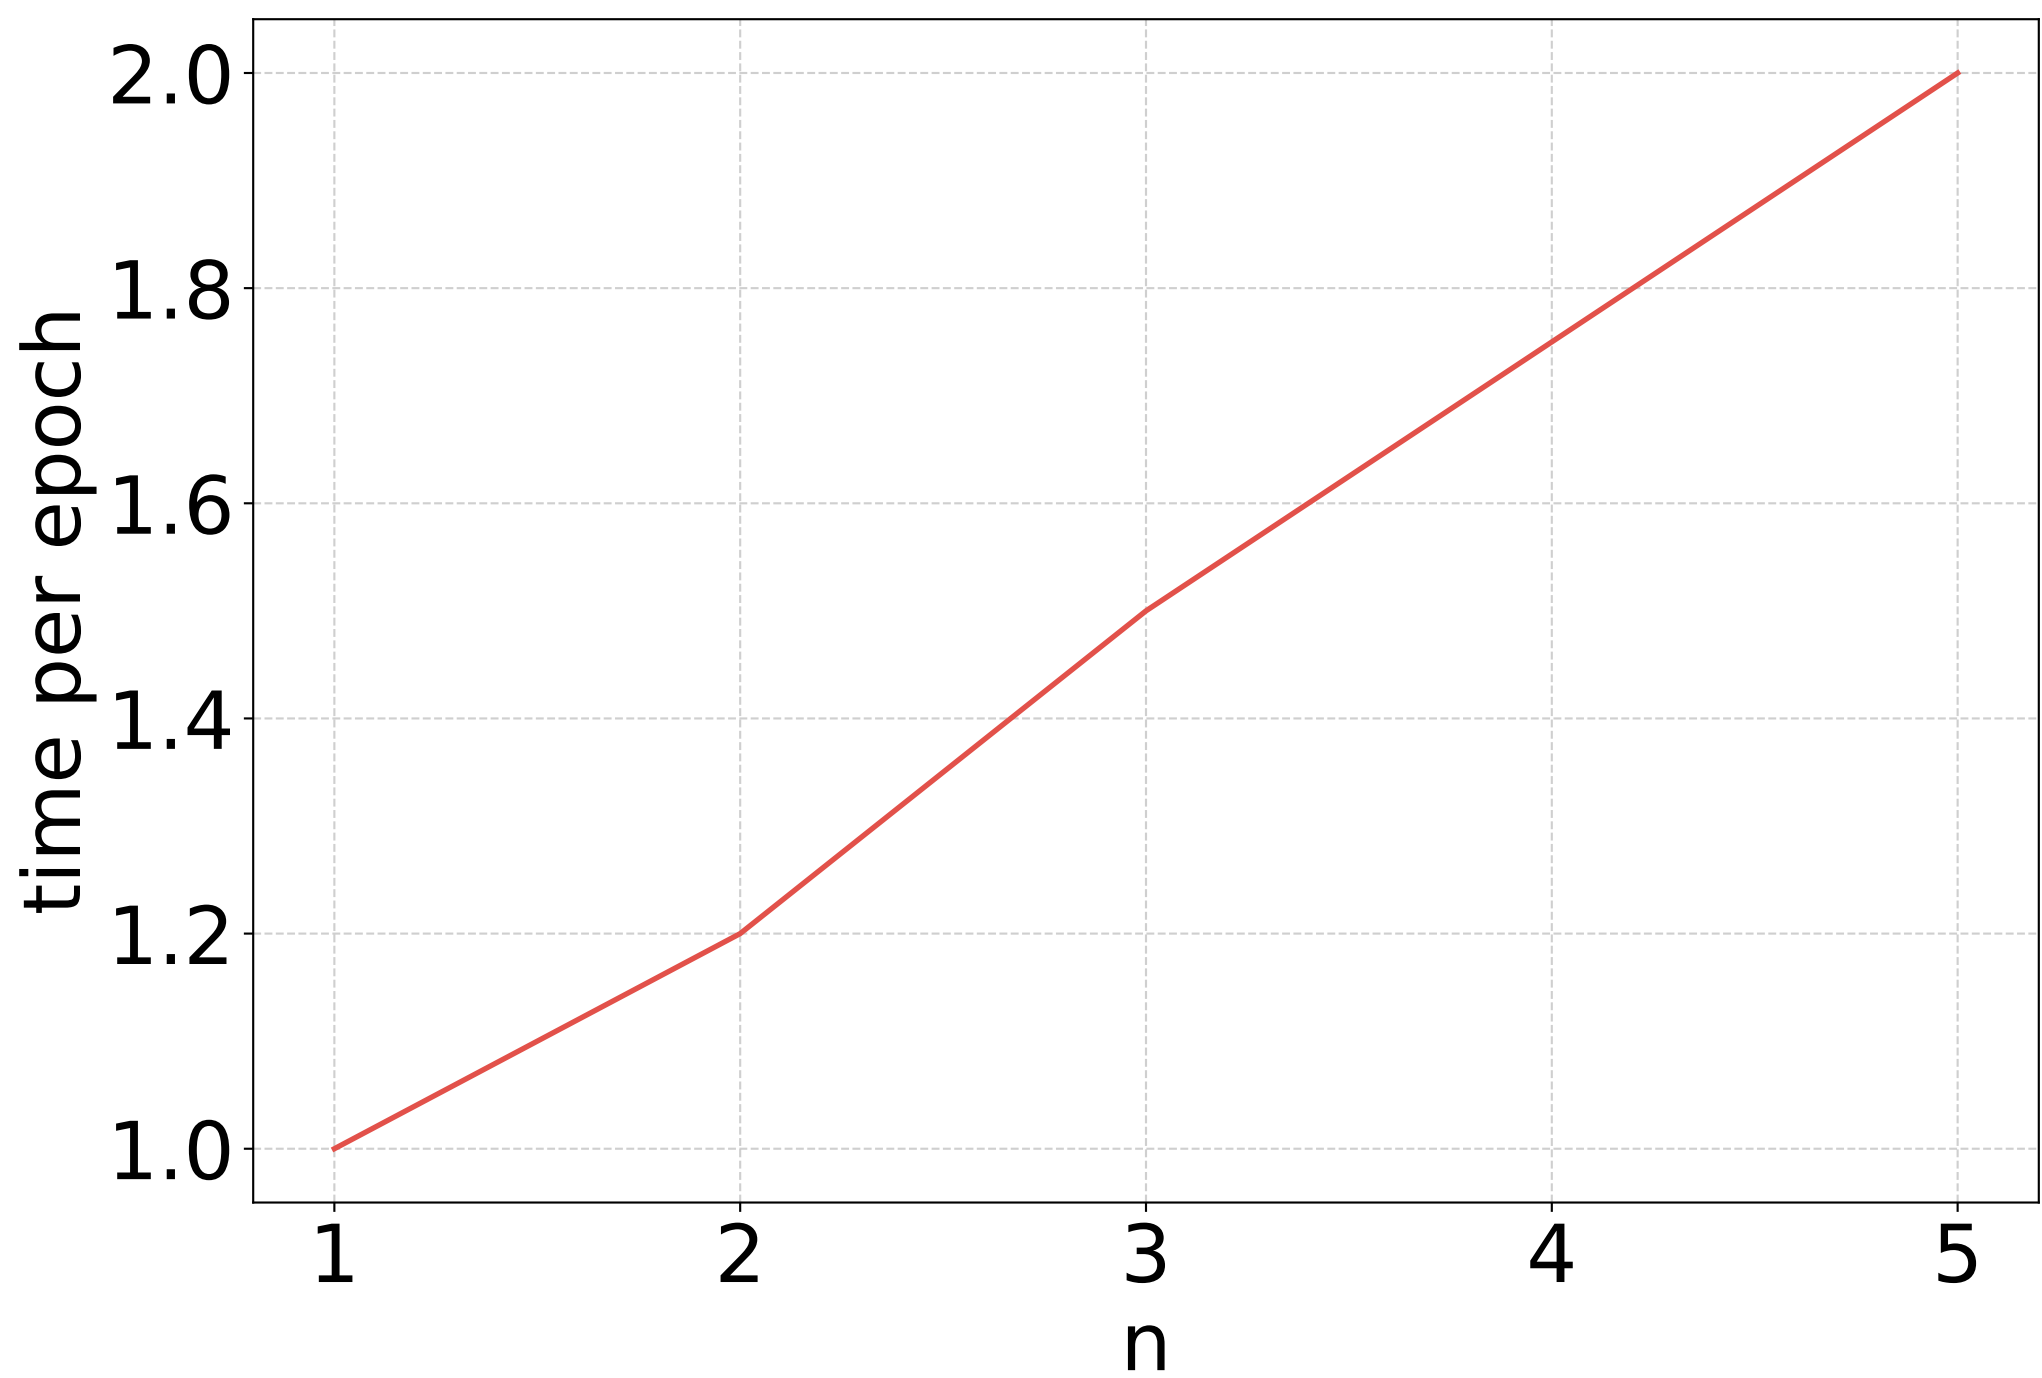

Supplement: supplementary_material [file impulse_plot_time_per_epoch.pdf › figs/impulse_plot_time_per_epoch.pdf]

Max Norm

$10^1$

0

10

20

30

40

50

60

Layers

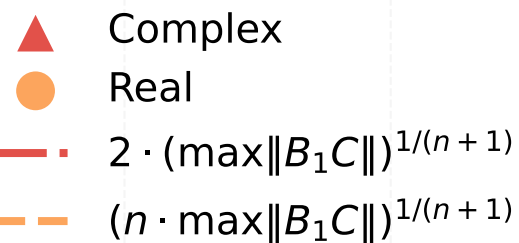

Supplement: supplementary_material [file max_norm.pdf › figs/max_norm.pdf]

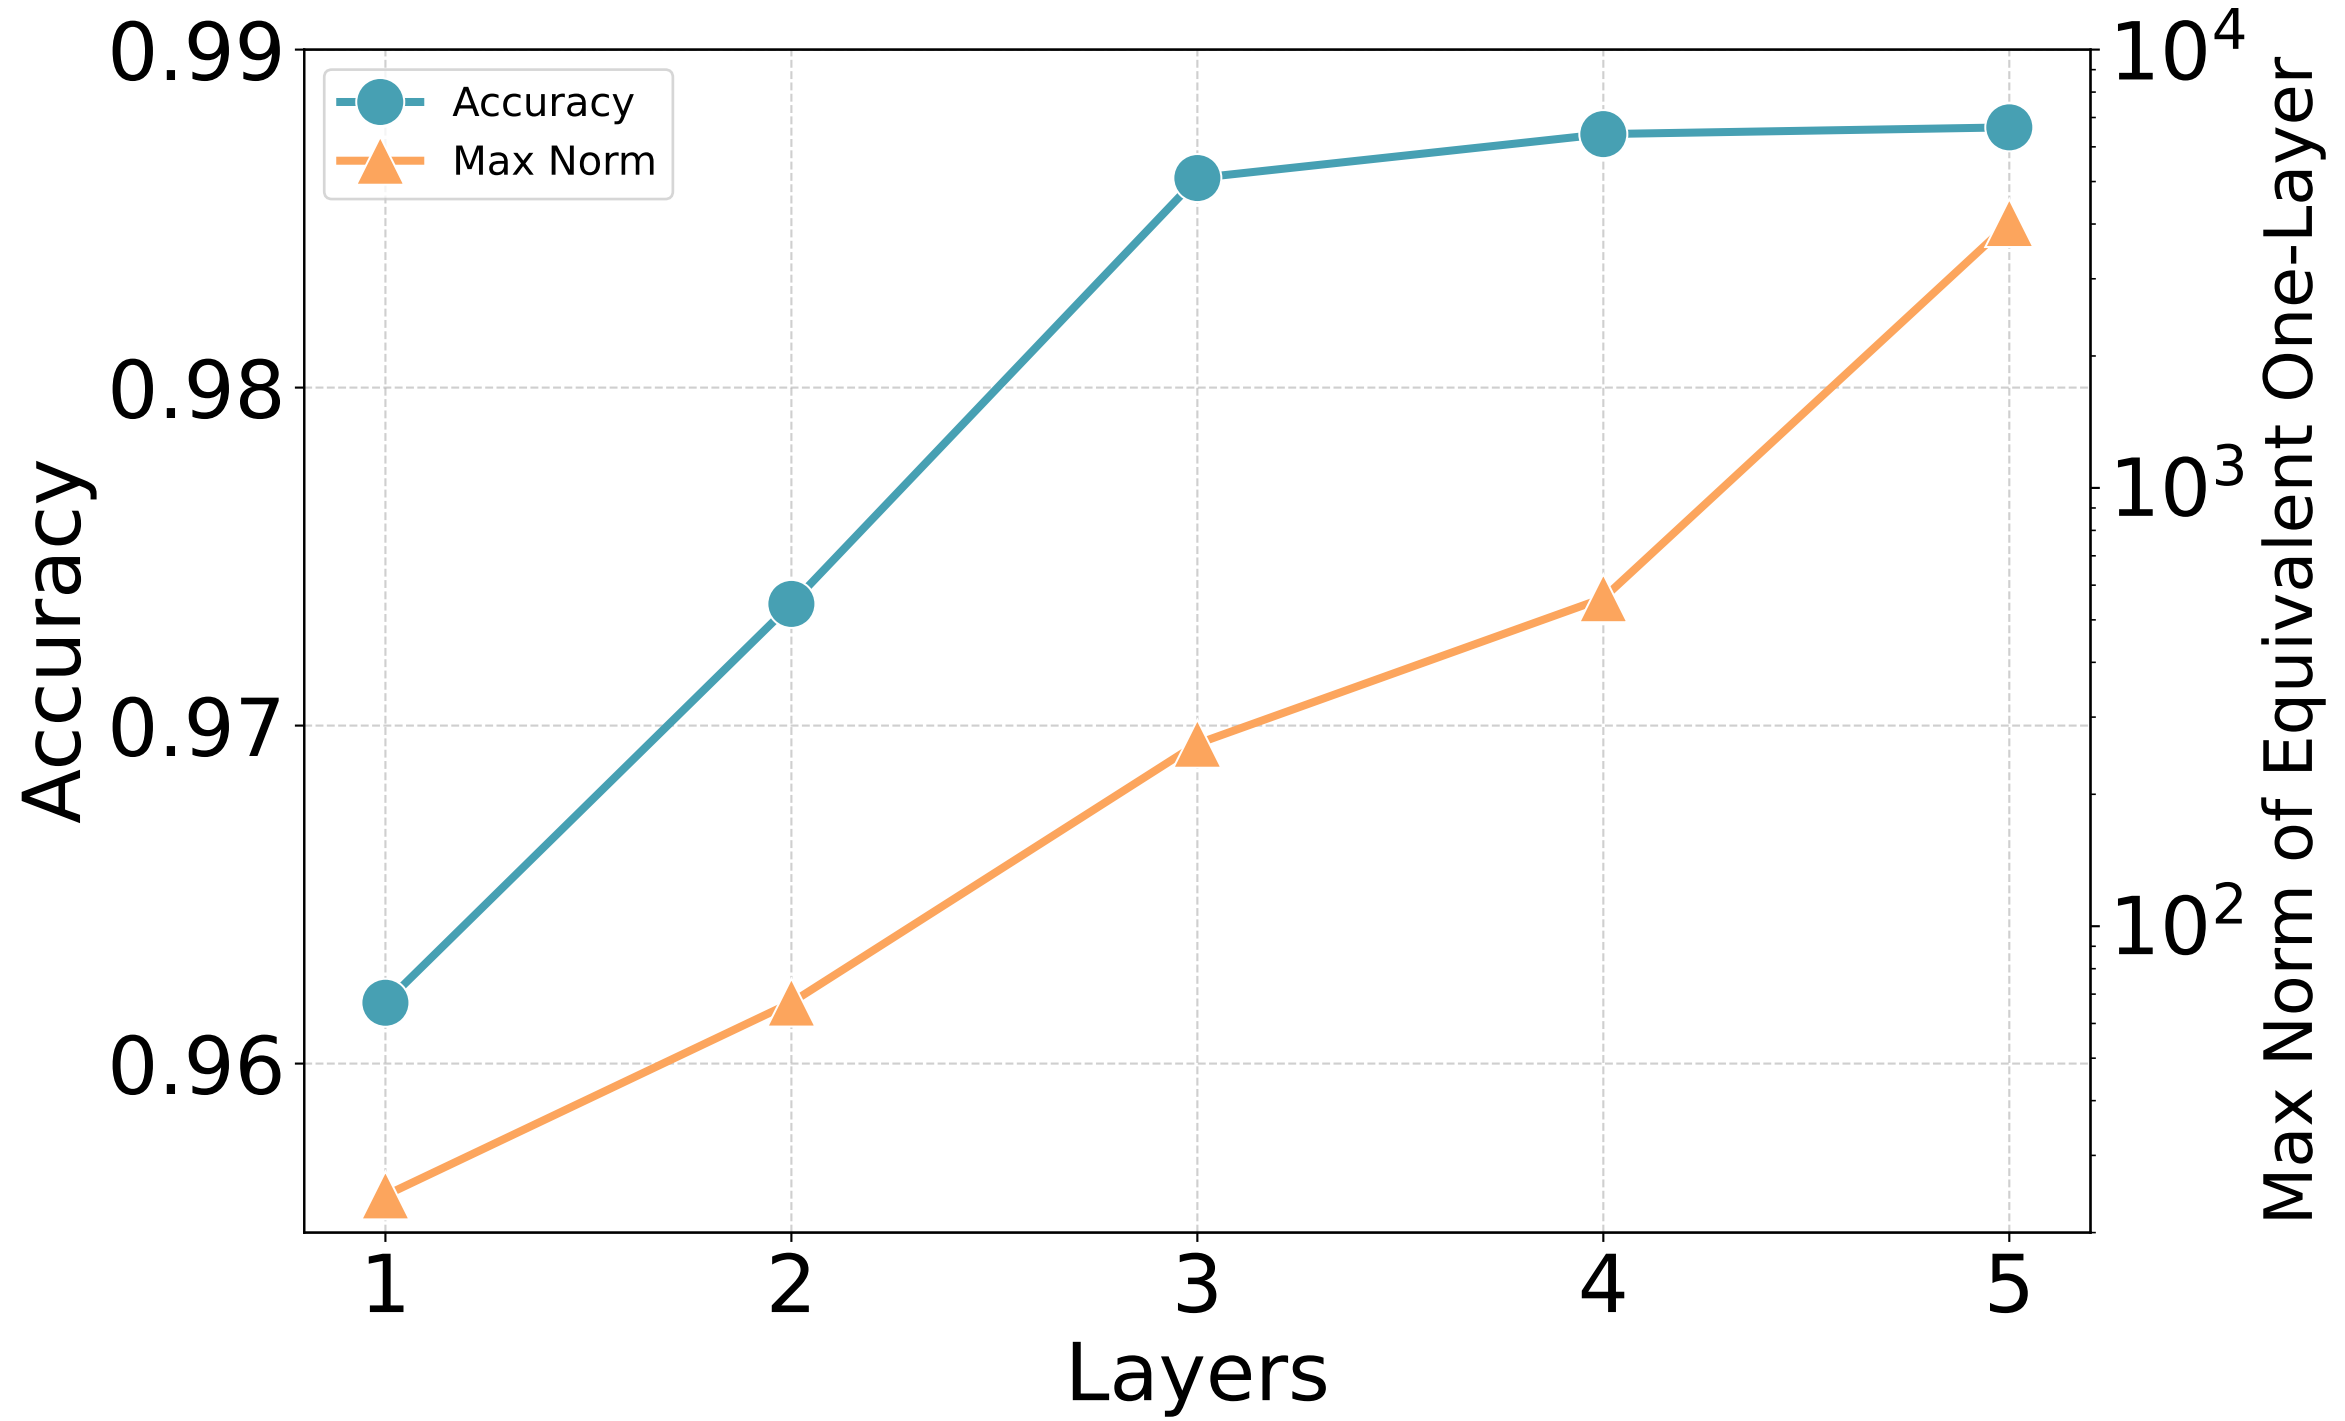

Supplement: supplementary_material [file mnist.pdf › figs/mnist.pdf]

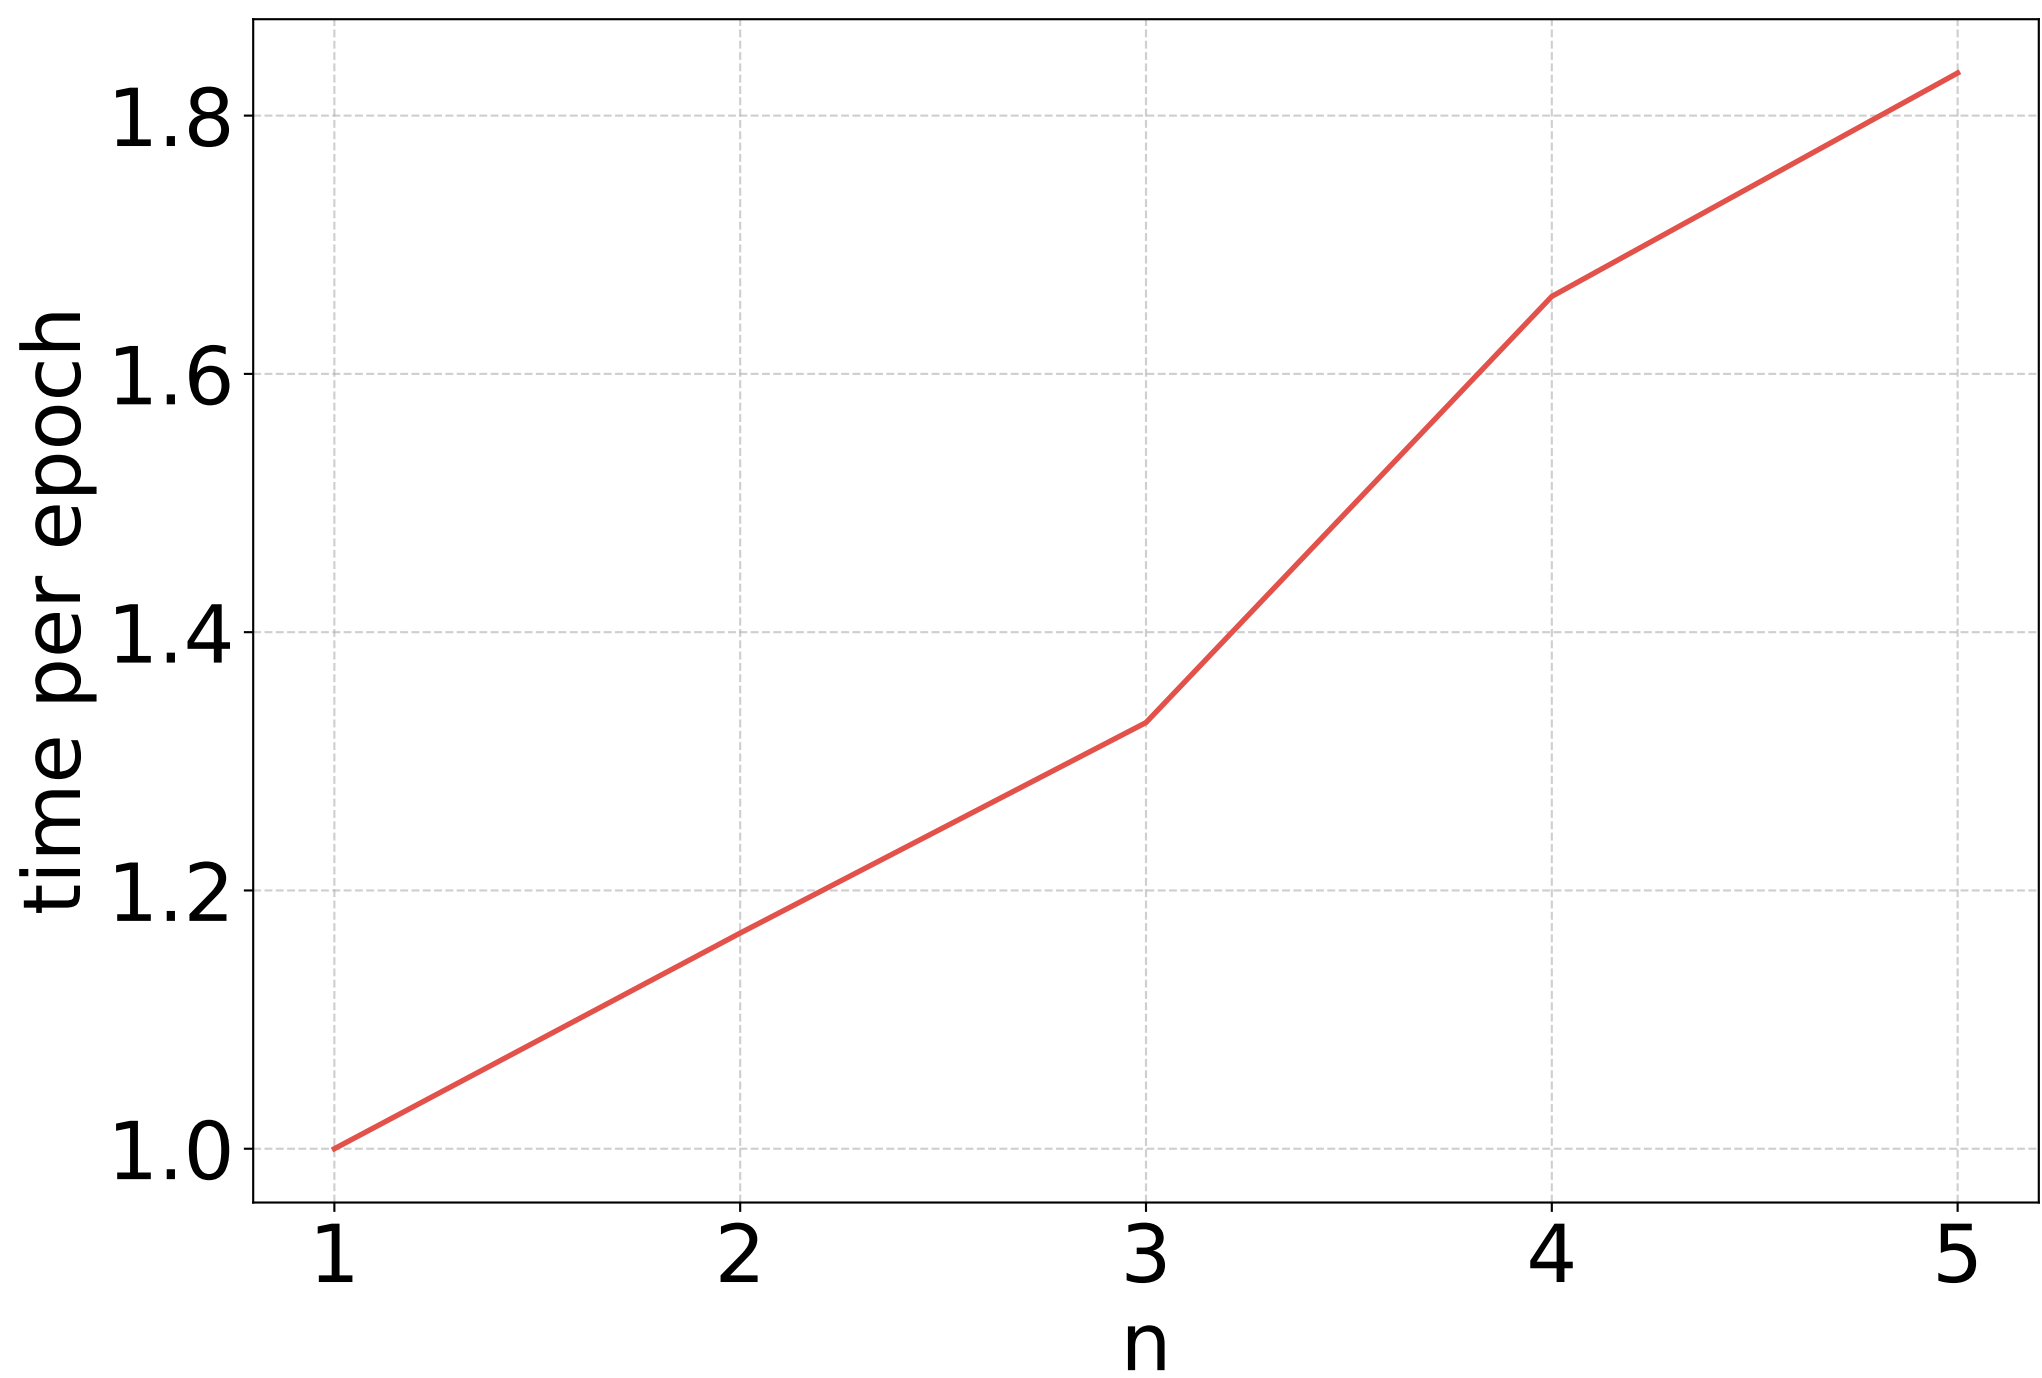

Supplement: supplementary_material [file mnist_plot_time_per_epoch.pdf › figs/mnist_plot_time_per_epoch.pdf]
